# Supplementary material for: An electrochemical sensor–adsorbent for lead (Pb2+) ions in an aqueous environment based on Katiragum–Arginine Schiff base
Source: Royal Society of Chemistry journal article supplement (doi:10.1039/d2nj04190a), 2022-01-01
Supplement: d2nj04190a1.pdf [file d2nj04190a1.pdf]

1  
2  
3  
4  
5  
6  
7  
8  
9  
10  
11  
12  
13  
14  
15  
16  
17  
18  
19  
20

## Supporting Information

### Electrochemical Sensor-Adsorbent for Lead (Pb<sup>2+</sup>) Ions in Aqueous Environment by Katiragum-Arginine Schiff Base

Rakesh Kumar Saren<sup>1</sup>, Shankha Banerjee<sup>2</sup>, Barun Mondal<sup>1</sup>, Sanjib Senapati<sup>2</sup> and Tridib Tripathy<sup>1\*</sup>

<sup>1</sup>Postgraduate Division of Chemistry, Midnapore College (Autonomous), Midnapore, PaschimMedinipur, 721101, West Bengal, India.

<sup>2</sup>Department of Biotechnology, BJM School of Bioscience, Indian Institute of Technology Madras, Chennai 600036, India.

\*Corresponding author

E-mail: [tridib.tripathy@midnaporecollege.ac.in](mailto:tridib.tripathy@midnaporecollege.ac.in), [tridib\\_tripathy@yahoo.co.in](mailto:tridib_tripathy@yahoo.co.in)

Tel/Fax: +913222275847

## 21 **1. Experimental**

### 22 **1.1 Determination of dialdehyde content**

23 The dialdehyde content in KGD is determined spectrophotometrically according to the previous  
24 report.<sup>1</sup> The detail procedure is given in our previous communication.<sup>2</sup> Shortly, a fixed amount  
25 of KGD is allowed to react with 2,4- dinitrophenyl hydrazine (2,4-DNPH) in water. The solution  
26 is vigorously stirred upto 90 min. The supernatant after centrifugation is analyzed by UV-VIS  
27 spectrophotometer (Schimadzu, Japan) at  $\lambda = 361$  nm to estimate the unreacted DNPH. The  
28 dialdehyde content (DAC) in KGD is calculated by using the following equation

$$30 \quad \text{DAC}(\text{mmole/g}) = \frac{\text{Reacted 2,4-DNPH}(\text{mmol/g})/198.14}{\text{Conc}(\%) \times 10^{-4}} \quad \text{Eq. (S1)}$$

31 The dialdehyde content is found to be in the KGD 68.67 %.

### 32 **1.2 Detection Limit**

33 Following equation is used for the calculation of limit of detection (LOD).<sup>3</sup>

$$34 \quad \text{LOD} = 3\sigma/K \quad \text{Eq. (S2)}$$

35 Where,  $\sigma$  is the standard deviation obtained from the graph of I (A) versus concentration of  
36 KGDR (Fig. S7b) and K refers to the slope of the calibration curve obtained by plotting current I  
37 (A) vs concentration of  $\text{Pb}^{2+}$  (Fig. 4b).

38

39

40

41

### 42 1.3 Adsorption Kinetics

43 Pseudo first order, pseudo second order kinetics and intra particle diffusion kinetic models are  
44 used to evaluate the adsorption kinetics.

45 The pseudo first order or Lagergren kinetic model is expressed by the following equation<sup>4</sup>

$$46 \quad \ln(q_e - q_t) = \ln q_e - k_1 t \quad \text{Eq. (S3)}$$

47 where,  $q_e$  and  $q_t$  are the amount of  $\text{Pb}^{2+}$  adsorbed by KGDR at equilibrium and at the time  $t$   
48 respectively in  $\text{mg g}^{-1}$ ,  $k_1$  is the pseudo first order rate constant which is calculated from the slope  
49 of the plot  $\ln(q_e - q_t)$  versus  $t$ .

50 The pseudo second order kinetic model is expressed by the following equation<sup>5</sup>

$$51 \quad \frac{t}{q_t} = \frac{1}{k_2 q_e^2} + \frac{1}{q_e} t \quad \text{Eq. (S4)}$$

52 Where,  $k_2$  is the pseudo second order rate constant in  $\text{g mg}^{-1} \text{min}^{-1}$  is calculated from the slope  
53 and intercept of the plot of  $t/q_t$  versus  $t$ .

54 The intra particle diffusion model is developed by Weber and Morris,<sup>6</sup> which explains the  
55 diffusion kinetics and mechanism of adsorption. It is represented as:

$$56 \quad q_t = k_d t^{1/2} + c \quad \text{Eq. (S5)}$$

57 Where,  $k_d$  ( $\text{mg.g}^{-1}.\text{min}^{-1/2}$ ) is the intra particle diffusion rate constant,  $c$  is the boundary layer  
58 thickness.  $k_d$  and  $c$  are calculated from the slope and the intercept of the plot  $q_t$  versus  $t^{1/2}$   
59 respectively.

#### 60 1.4 Adsorption isotherms

61 Three adsorption isotherm models namely Freundlich, Langmuir and Temkin are used to  
62 describe the adsorption equilibrium between the adsorbed  $[Pb^{2+}]$  and the residual  $[Pb^{2+}]$  in the  
63 solution over the entire studied concentration range.

64 Freundlich isotherm model is used to express the adsorption process onto the heterogeneous  
65 surface of the adsorbents. The isotherm is expressed by<sup>7</sup>

$$66 \quad q_e = K_F C_e^{1/n} \quad \text{Eq. (S6)}$$

67 The linearized form of the adsorption is expressed by the following equation

$$68 \quad \ln q_e = \ln K_F + \frac{1}{n} \ln C_e \quad \text{Eq. (S7)}$$

69 Where,  $K_F$  ( $L \cdot g^{-1}$ ) and  $1/n$  are Freundlich adsorption isotherm constants respectively.  $K_F$  and  $1/n$   
70 are calculated from the slope and intercept of the straight line plot  $\ln q_e$  versus  $\ln C_e$ .

71 In the Langmuir isotherm model, it is assumed that adsorption process takes place at the  
72 homogeneous sites of adsorbent's surface which is filled with non-interacting adsorbent  
73 molecules and the adsorption process follows monolayer adsorption mechanism. The linear form  
74 of the equation is expressed by<sup>8</sup>

$$75 \quad \frac{1}{q_e} = \frac{1}{b q_m C_e} + \frac{1}{q_m} \quad \text{Eq. (S8)}$$

76 Where  $C_e$  ( $mg \cdot L^{-1}$ ) represents the equilibrium  $Pb^{2+}$  ion concentration,  $q_e$  ( $mg \cdot g^{-1}$ ) denotes amount  
77 of  $Pb^{2+}$  adsorbed onto the KGDR at equilibrium.  $q_m$  ( $mg \cdot g^{-1}$ ) and  $b$  ( $L \cdot mg^{-1}$ ) are Langmuir  
78 constants, which are calculated from the slope and intercept of the linear plot of  $1/q_e$  versus  $1/C_e$ .

79 The characteristic parameter of Langmuir isotherm is expressed by a dimensionless parameter  
80  $R_L$ , called equilibrium parameter which is represented as follows

$$81 \quad R_L = \frac{1}{1 + bC_0} \quad \text{Eq. (S9)}$$

82 The  $R_L$  value lies within 0 to 1 indicate a favourable adsorption process.

83 Temkin isotherm model consider the adsorbent-adsorbate interaction where it is assumed that,  
84 increasing the surface coverage by adsorption linearly decreases the heat of adsorption of all the  
85 molecules in the layer. Temkin adsorption isotherm model is expressed by the following  
86 equation <sup>9</sup>

$$87 \quad q_e = \frac{RT}{b_T} \ln A_T + \frac{RT}{b_T} \ln C_e \quad \text{Eq. (S10)}$$

88 Where  $A_T$  is the Temkin isotherm constant ( $L.g^{-1}$ ),  $T$  is the absolute temperature,  $R$  is the  
89 universal gas constant and  $b_T$  is the Temkin constant related to the heat of adsorption  $B$  ( $J.mole^{-1}$ )  
90 [ $B = RT/b_T$ ]. The value of  $A_T$  and  $b_T$  are calculated from slope and intercept of the plot  $q_e$  versus  
91  $\ln C_e$ .

## 92 **1.5 Adsorption thermodynamics**

93 Van't Hoff equation<sup>10</sup> is used to calculate various thermodynamic parameters like the enthalpy  
94 change ( $\Delta H^\circ$ ), changes in entropy ( $\Delta S^\circ$ ) of the adsorption in the temperature range  $10^\circ C$  to  $60^\circ C$ .

95 The Van't Hoff equation is

$$96 \quad \ln K_T = \frac{\Delta S^\circ}{R} - \frac{\Delta H^\circ}{RT} \quad \text{Eq. (S11)}$$

97 The standard free energy ( $\Delta G^\circ$ ) is calculated by the following equation

98 
$$\Delta G^\circ = \Delta H^\circ - T\Delta S^\circ$$
 Eq. (S12)

99 R is the universal gas constant (8.314 J.mol<sup>-1</sup>.K<sup>-1</sup>). The  $\Delta H^\circ$  and  $\Delta S^\circ$  are calculated from the  
100 linear plot between  $\ln K_T$  versus  $1/T$ .  $K_T$  is the thermodynamic equilibrium constant which can be  
101 calculated by using following equation<sup>11</sup>

102 
$$K_T = \frac{S_e}{C_0 - S_e}$$
 Eq. (S13)

103 Where  $S_e$  is the concentration of  $Pb^{2+}$  adsorbed onto KGDR at equilibrium and  $C_0$  is the initial  
104 concentration of  $Pb^{2+}$ .

105

106  
107  
108  
109  
110  
111  
112  
113  
114  
115  
116  
117  
118  
119  
120  
121  
122  
123  
124  
125  
126  
127

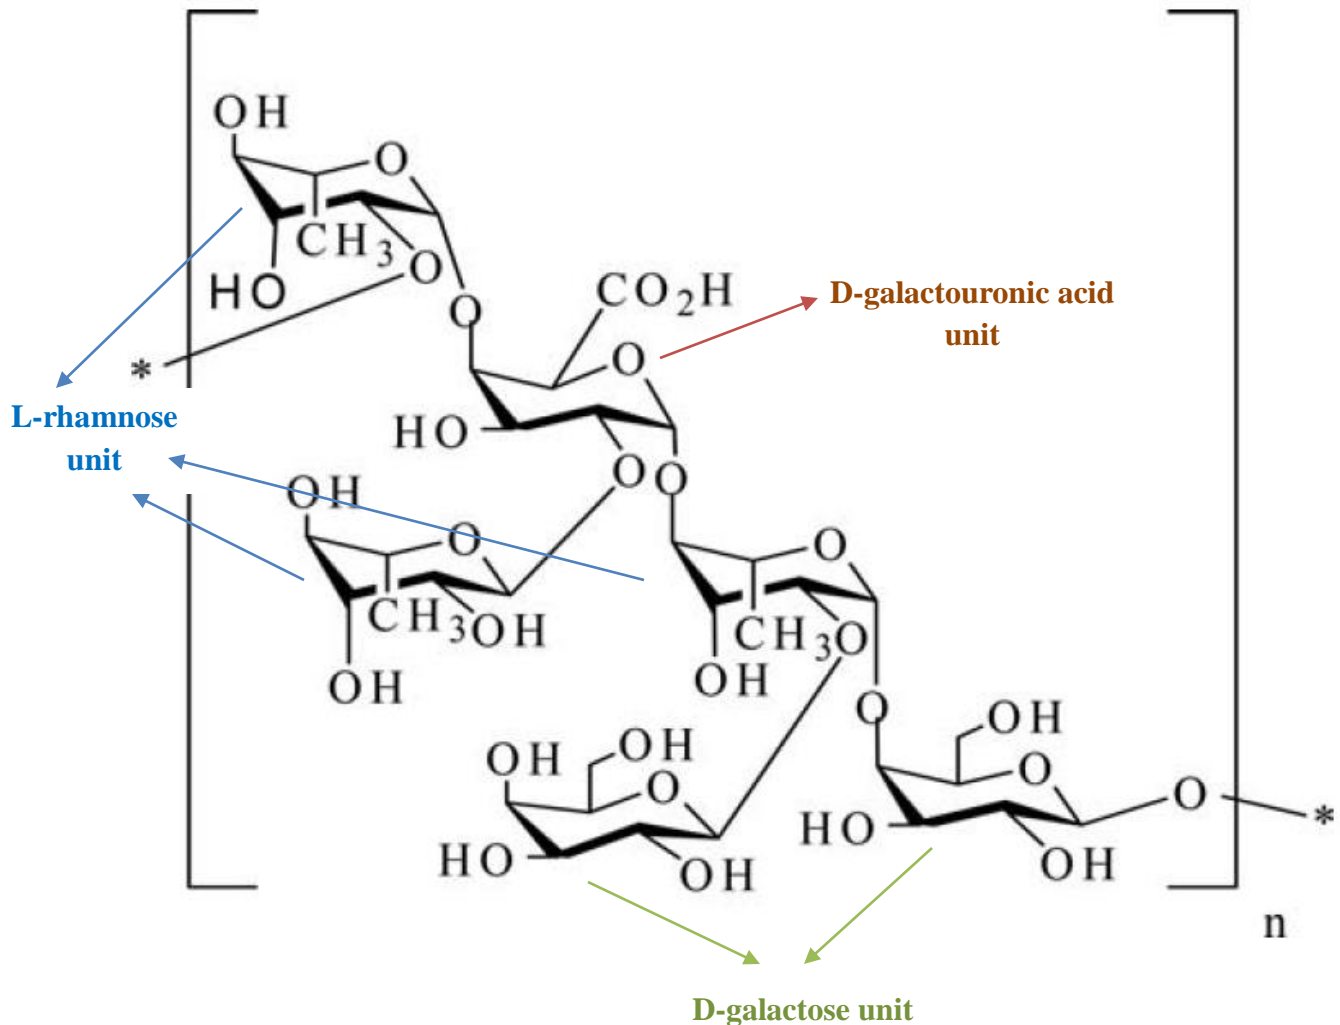

**Fig. S1** The structure of Katiragum showing the monosaccharide units.





131 **Fig. S2**  $^1\text{HMR}$  spectroscopy of (a) KGD (b) KGDR.

132

133

134

135

136

137

138

139

140

141

142

143

144

145

146

147

148

149

150

151

152 **Fig. S3** FTIR spectra of (a) KG (b) KGD (c) KGDR

153

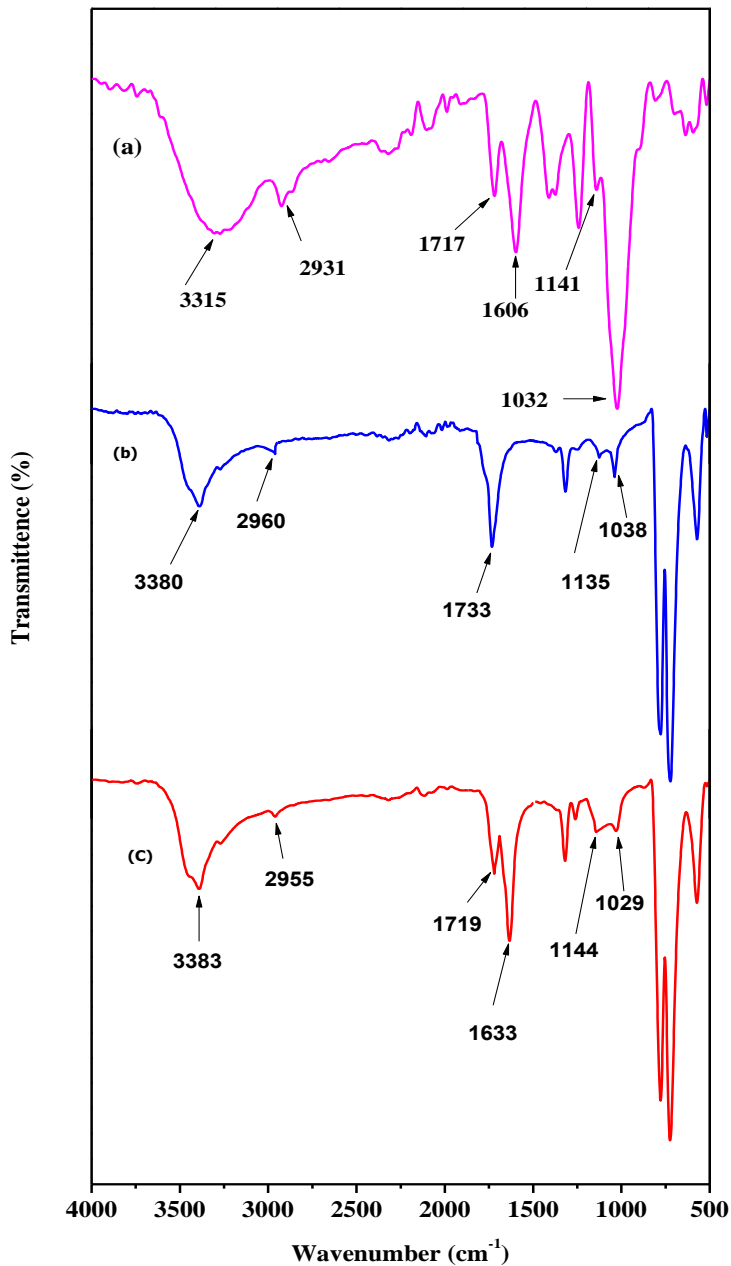

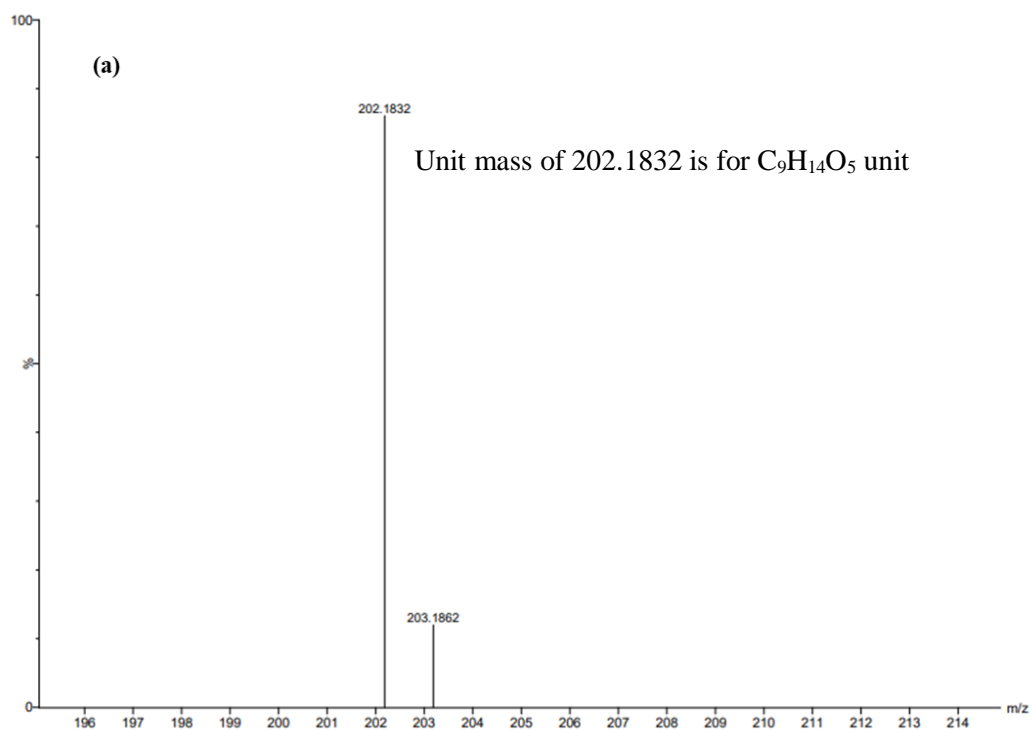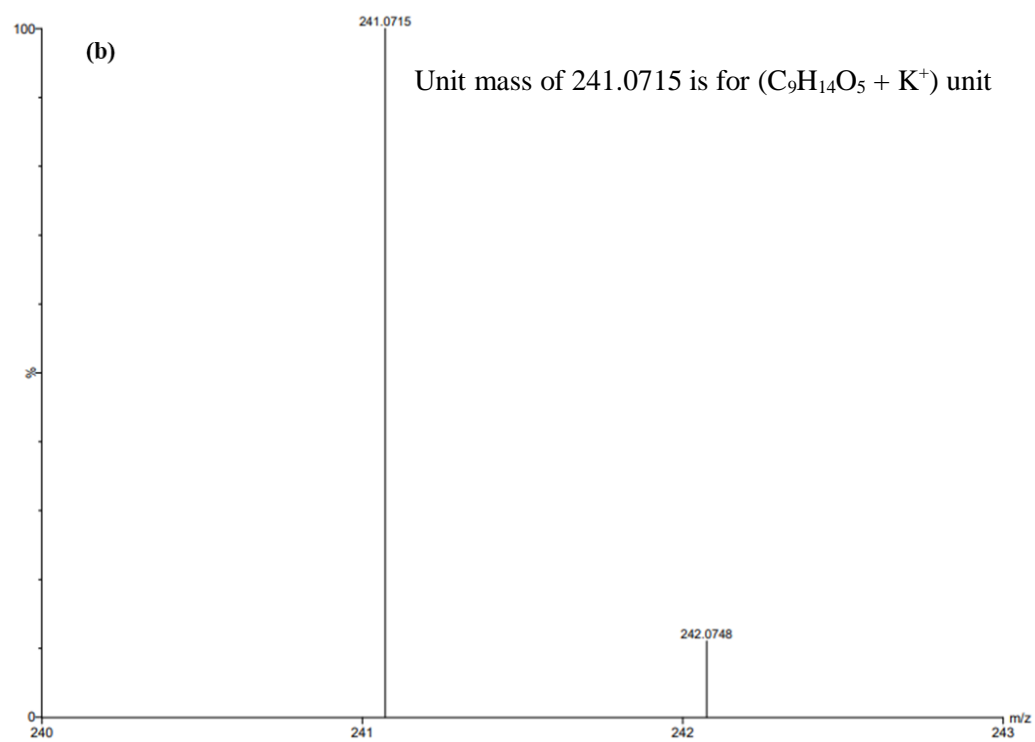

157

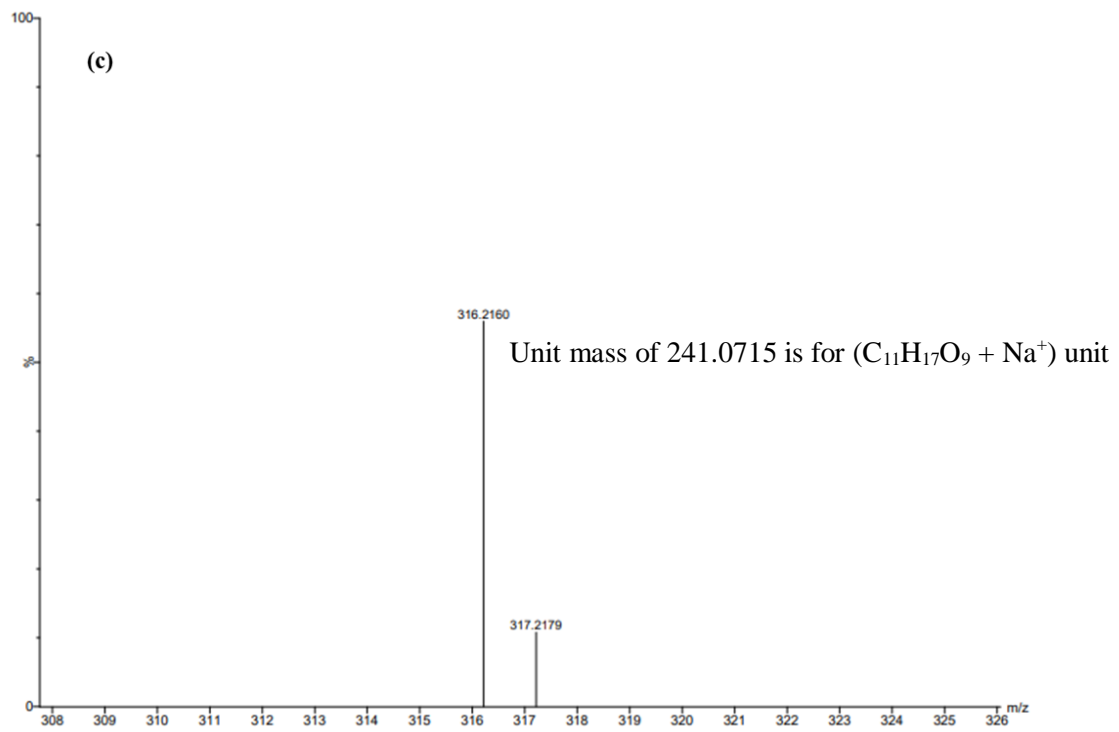

158

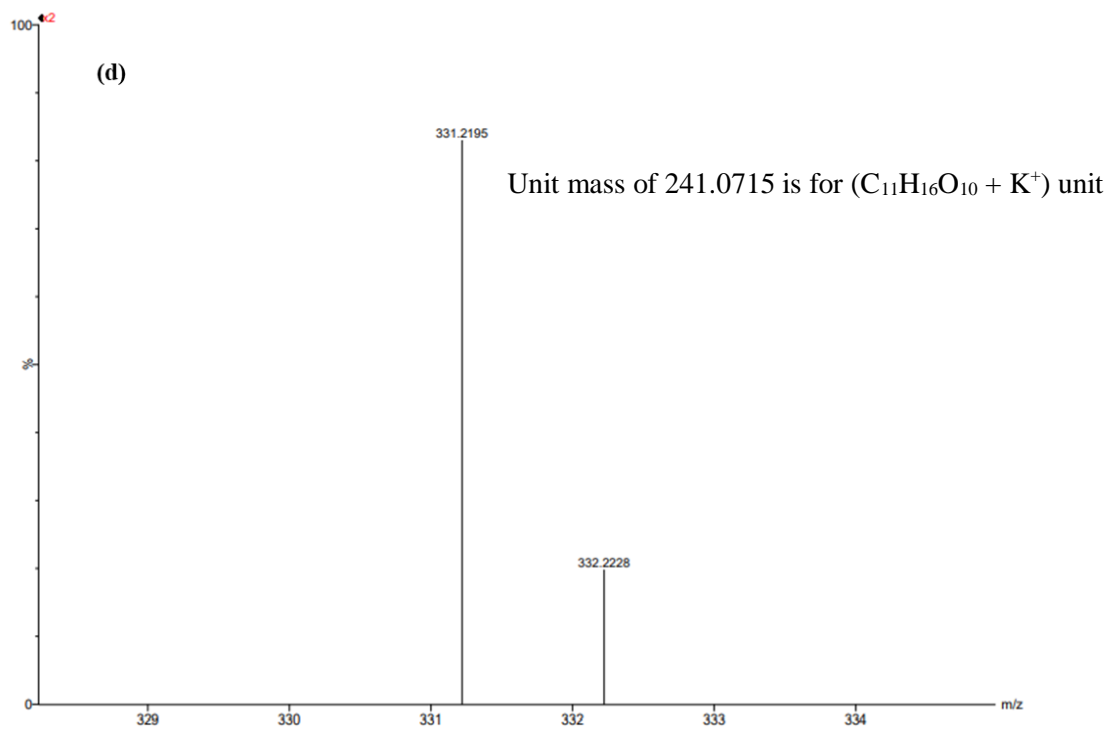

159

160 **Fig. S4** High Resolution Mass Spectral analysis of KGD showed characteristic peaks for (a)  
161  $C_9H_{14}O_5$  molecular unit, (b)  $C_9H_{14}O_5$  molecular unit with  $K^+$  cation, (c)  $C_{11}H_{17}O_9$  molecular unit  
162 with  $Na^+$  cation, and (d)  $C_{11}H_{16}O_{10}$  molecular unit with  $K^+$  cation.

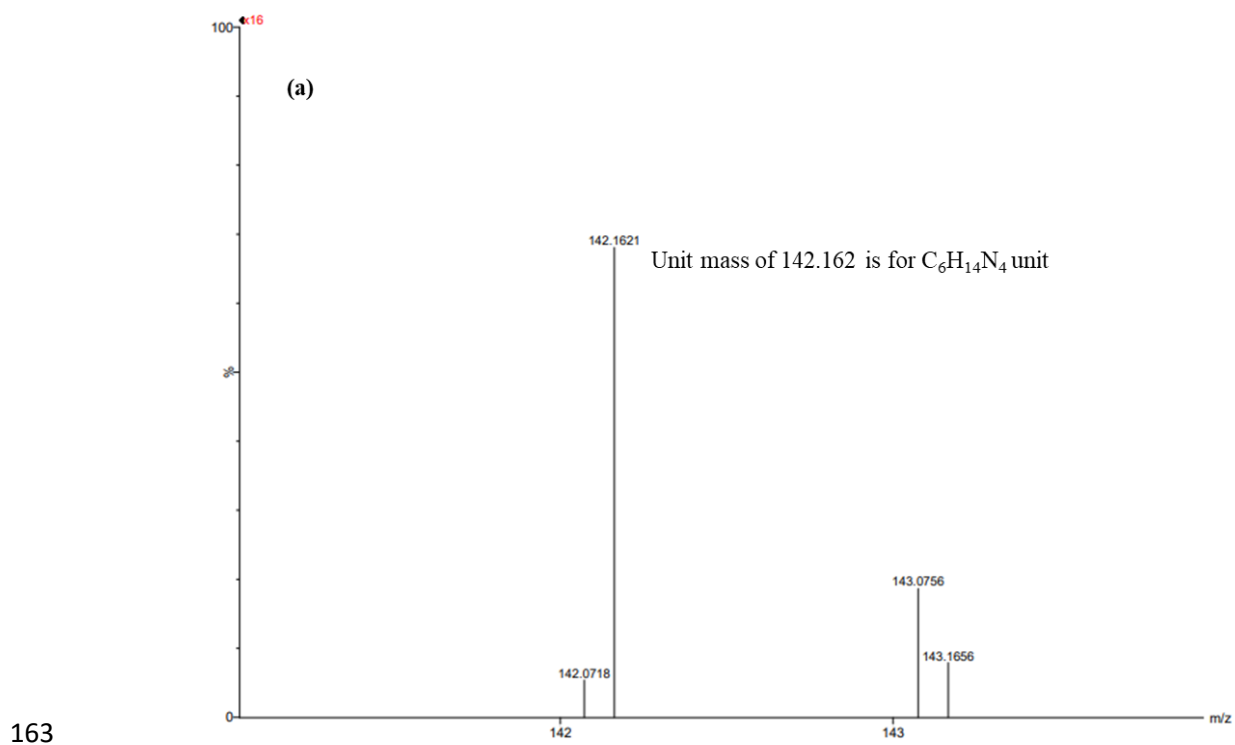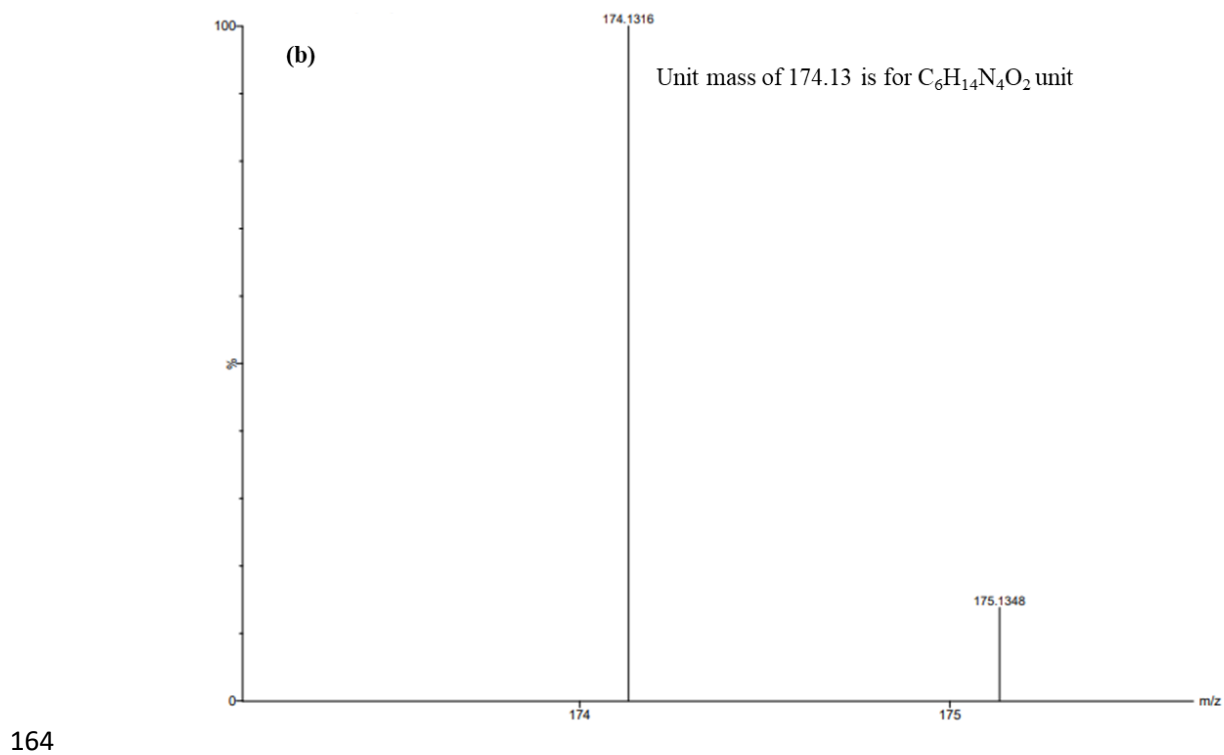

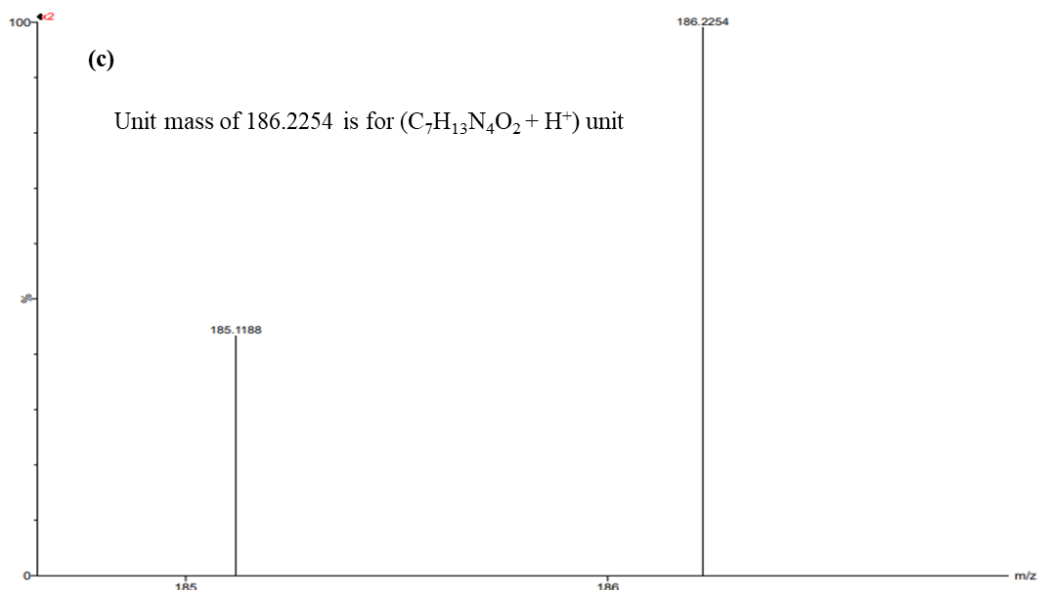

165

166 **Fig. S5** High Resolution Mass Spectral analysis of KGDR showed characteristic peaks for (a)  
 167  $C_6H_{14}N_4$  unit, (b)  $C_6H_{14}N_4O_2$  unit, and (c)  $C_7H_{13}N_4O_2$  unit with  $H^+$  cation.

168

169

170

171

172

173

174

175

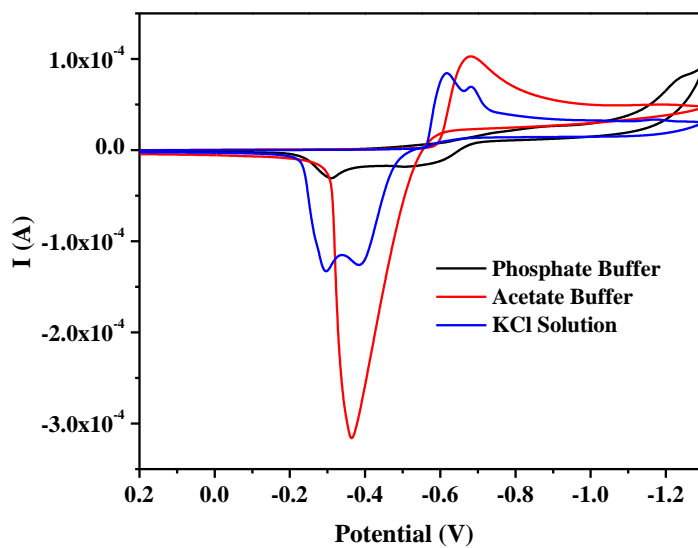

176

177

178 **Fig. S6** CV analysis of KGDR/GCE in various electrolyte solutions (pH=5).

179

180

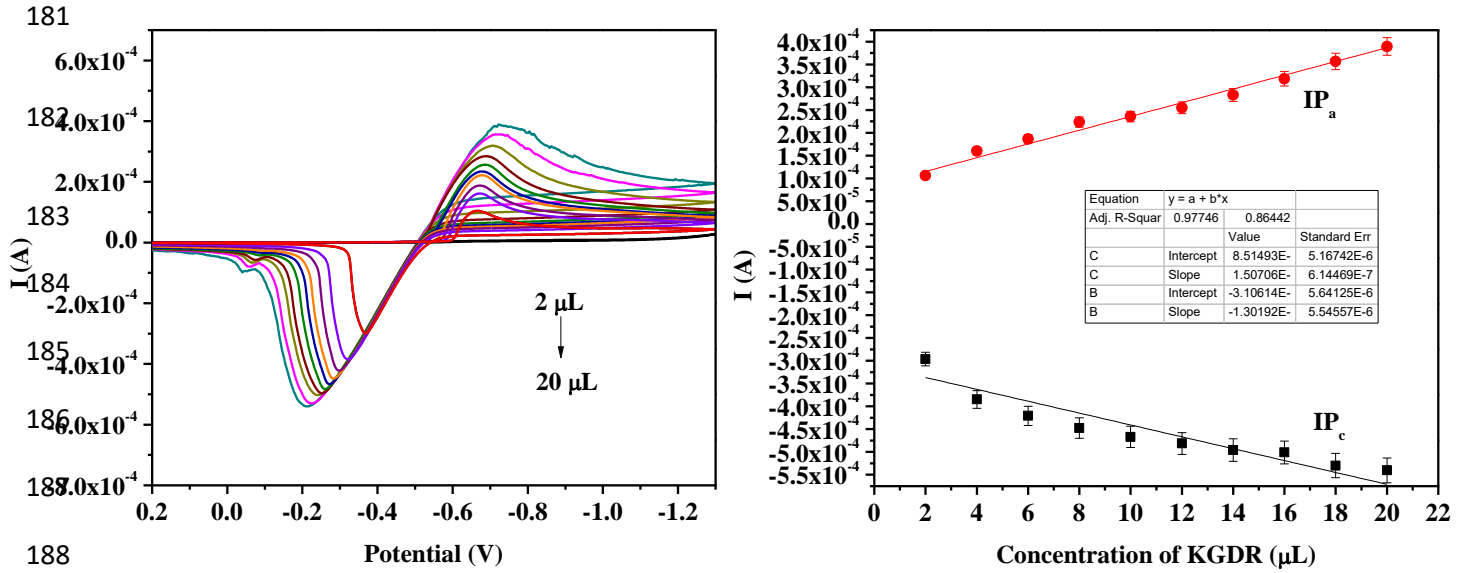

188

189

190 **Fig. S7** (a) CV analysis of KGDR/GCE in 0.1 (M) ABS (pH 5) at various concentrations of

191 KGDR ( $2 \mu\text{L}$  to  $20 \mu\text{L}$ ). (b) Calibration curve of peak current ( $I$  (A)) versus concentration of

192 KGDR.

193

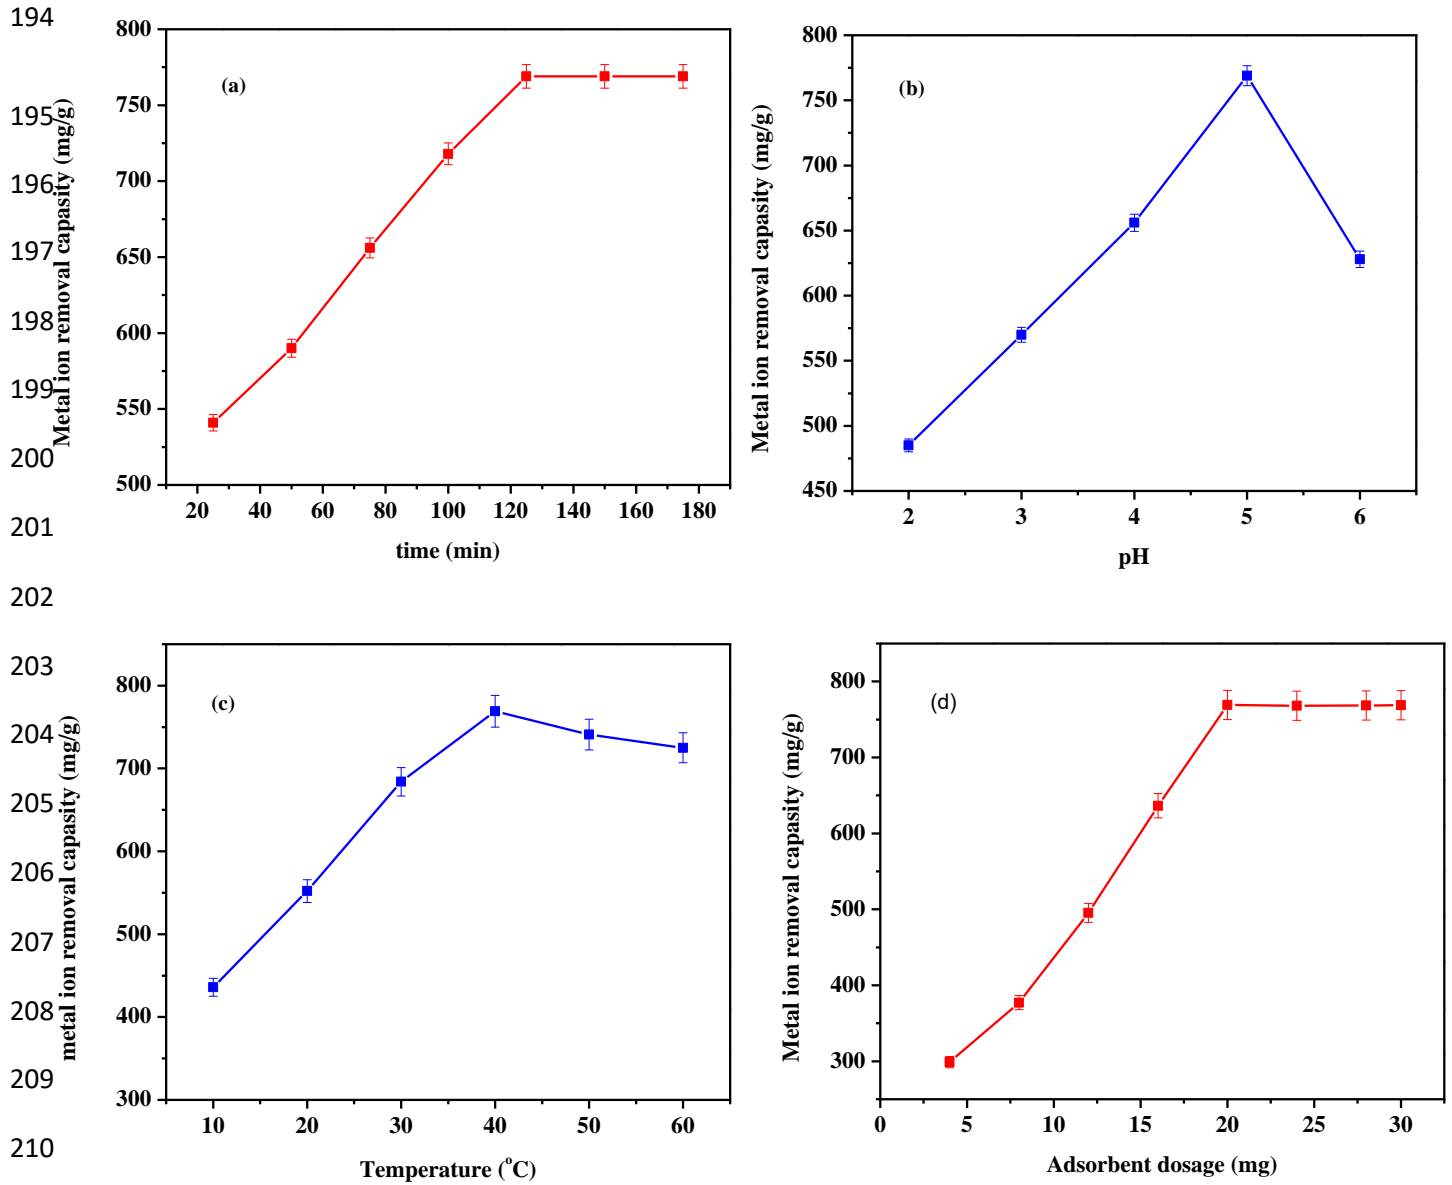

212 **Fig. S8** Effect of (a) contact time (b) pH (c) temperature (d) adsorbent dosage of Pb<sup>2+</sup> ion  
 213 adsorption onto the surface of KGDR.

214

215

216

217

218  
219  
220  
221  
222  
223  
224  
225  
226  
227  
228  
229  
230  
231  
232  
233  
234  
235  
236  
237  
238  
239  
240  
241  
242

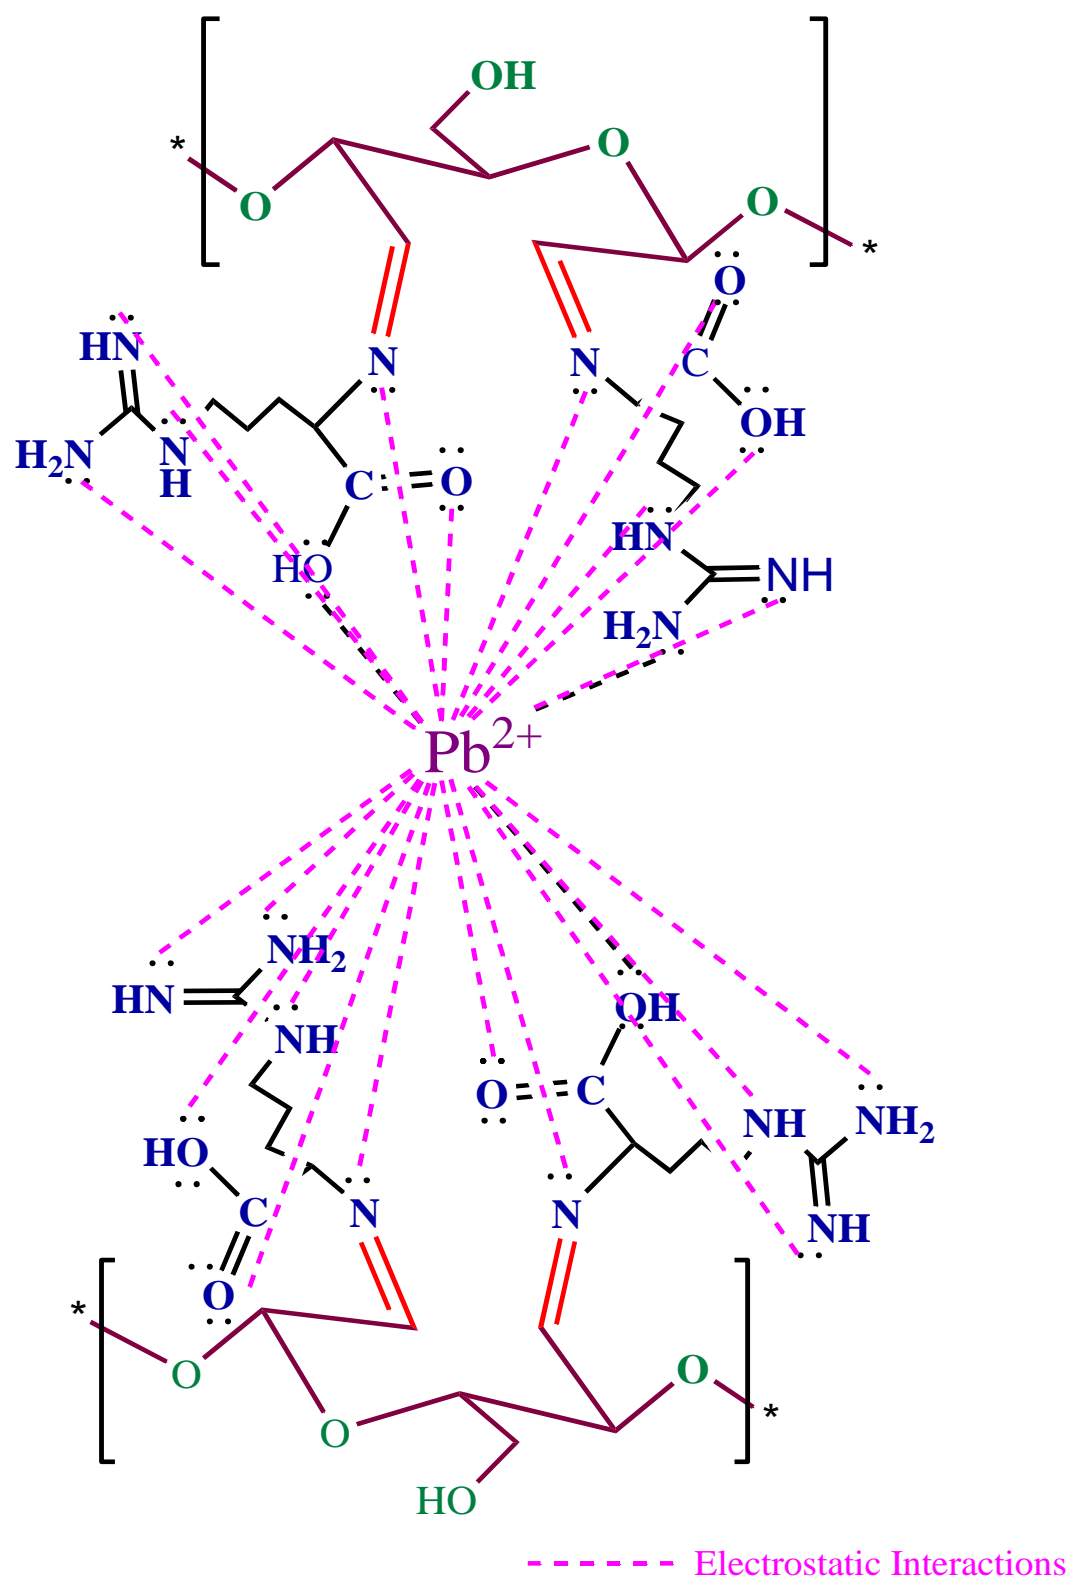

Fig. S9 Adsorption mechanism of KGDR.



243

244

245

246

247

248

249

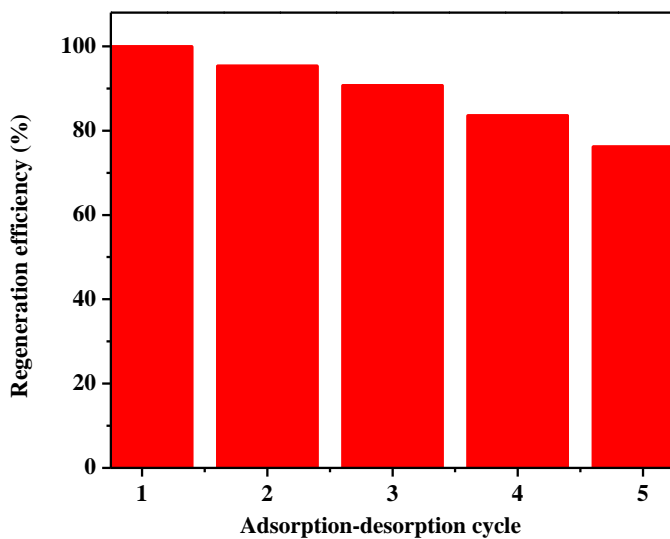

250

251 **Fig. S10** Pb<sup>2+</sup> ion adsorption-desorption cycle by KGDR.

252

253

254

255

256

257

258

259

260 **Table S1** Comparison of KGDR/GCE with some previously reported works for sensing of Pb<sup>2+</sup>  
 261 ions.

| Modifier                                | Method | Detection limit (μM) | Reference |
|-----------------------------------------|--------|----------------------|-----------|
| CB-18-crown-6/GCE                       | DPASV  | 1.5                  | 12        |
| ZnFe <sub>2</sub> O <sub>4</sub> /GCE   | DPASV  | 0.56                 | 13        |
| Salicylic acid                          | CV     | 0.18                 | 14        |
| P(DPA-co-2ABN)/GC-ME                    | DPASV  | 0.165                | 15        |
| GSH-Fe <sub>3</sub> O <sub>4</sub> /GCE | SWASV  | 0.182                | 16        |
| G/PANI/PS nanoporous fiber/GCE          | CV     | 3.3                  | 17        |
| MWCNTs/synthesis Schiff base/CPE        | SWASV  | 0.25                 | 18        |
| SWCNHs/SPE                              | SWASV  | 0.4                  | 19        |
| ZnO-Gr/SPCE                             | ASV    | 0.8                  | 20        |
| KGDR/GCE                                | CV     | 0.146                | This work |

262 DPASV: Differential pulse anodic stripping Voltammetry. CV: Cyclic Voltammetry

263 SWASV: square wave anodic stripping Voltammetry. ASV: anodic stripping Voltammetry

264

265

266 **Table S2** Summary of the CV analysis of KGDR/GCE towards Pb<sup>2+</sup> sensing from real samples.

| Samples | Added Pb <sup>2+</sup> ion (μM) | Obtained (μM) | Recovery % | RSD (%) |
|---------|---------------------------------|---------------|------------|---------|
| 1       | 5                               | 4.92          | 98.4       | 4.7     |
| 2       | 10                              | 9.89          | 98.9       | 3.2     |
| 3       | 15                              | 14.95         | 99.67      | 3.8     |

271

272 **Table S3** Various parameters of adsorption kinetics along with their  $R^2$  values for  $Pb^{2+}$   
 273 adsorption onto the surface of KGDR (Condition:  $Pb^{2+}$  ion concentration 1 g/L, 1.5 g/L, 2.07  
 274 g/L, 2.5 g/L, 3 g/L and 3.5 g/L, pH = 5, temperature 40°C and contact time 125 min).

| <b>Pseudo-first-order-kinetics</b>    |                        |                        |                        |                        |                        |                        |
|---------------------------------------|------------------------|------------------------|------------------------|------------------------|------------------------|------------------------|
| Concentration of $Pb^{2+}$ ion (mg/L) | 1000                   | 1500                   | 2070                   | 2500                   | 3000                   | 3500                   |
| $k_1$ ( $min^{-1}$ )                  | 0.02012                | 0.01572                | 0.01836                | 0.02536                | 0.01828                | 0.02668                |
| Standard Deviation (SD)               | 0.1096                 | 0.01273                | 0.0986                 | 0.2045                 | 0.0109                 | 0.1175                 |
| Co-relation Coefficient ( $R^2$ )     | 0.94513                | 0.88383                | 0.94662                | 0.88478                | 0.93958                | 0.96366                |
| <b>Pseudo-second-order-kinetics</b>   |                        |                        |                        |                        |                        |                        |
| Concentration of $Pb^{2+}$ ion (g/L)  | 1000                   | 1500                   | 2070                   | 2500                   | 3000                   | 3500                   |
| $k_2$ (g/mg/min)                      | $6.436 \times 10^{-5}$ | $4.866 \times 10^{-5}$ | $6.262 \times 10^{-5}$ | $1.202 \times 10^{-5}$ | $8.327 \times 10^{-5}$ | $3.948 \times 10^{-5}$ |
| Standard Deviation (SD)               | $6.61 \times 10^{-3}$  | $8.52 \times 10^{-3}$  | $3.64 \times 10^{-3}$  | $1.55 \times 10^{-3}$  | $2.08 \times 10^{-3}$  | $2.47 \times 10^{-4}$  |
| Co-relation Coefficient ( $R^2$ )     | 0.99290                | 0.98167                | 0.99535                | 0.99894                | 0.99725                | 0.99995                |
| <b>Intra particle diffusion</b>       |                        |                        |                        |                        |                        |                        |
| Concentration of $Pb^{2+}$ ion (g/L)  | 1000                   | 1500                   | 2070                   | 2500                   | 3000                   | 3500                   |
| $k_2$ ( $mg/g \cdot min^{-1/2}$ )     | 25.452                 | 32.229                 | 30.808                 | 21.468                 | 27.096                 | 15.219                 |
| c (mg/g)                              | 189.474                | 225.439                | 391.122                | 650.323                | 754.59                 | 1135.772               |
| Standard Deviation (SD)               | 16.324                 | 20.542                 | 18.149                 | 15.348                 | 15.961                 | 18.388                 |
| Co-relation Coefficient ( $R^2$ )     | 0.93622                | 0.93697                | 0.94573                | 0.92175                | 0.94575                | 0.80065                |

275 **Table S4** Various parameters of adsorption isotherms along with their  $R^2$  values for  $Pb^{2+}$   
 276 adsorption onto the surface of KGDR (Condition:  $Pb^{2+}$  ion concentration 2.07 g/L, pH = 5,  
 277 temperature 40°C and contact time 125 min).

| <b>Langmuir Isotherm</b>          |                           |
|-----------------------------------|---------------------------|
| $q_m$ (mg.g <sup>-1</sup> )       | 5482.46                   |
| $b$ (L.mg <sup>-1</sup> )         | 5.985 x 10 <sup>-5</sup>  |
| $R_L$                             | 0.8902                    |
| Standard Deviation (SD)           | 1.8896 x 10 <sup>-5</sup> |
| Co-relation coefficient ( $R^2$ ) | 0.99746                   |
| <b>Freundlich Isotherm</b>        |                           |
| $K_F$ (L.g <sup>-1</sup> )        | 0.00704                   |
| $n$                               | 0.63                      |
| Standard Deviation (SD)           | 0.03302                   |
| Co-relation coefficient ( $R^2$ ) | 0.98709                   |
| <b>Temkin Isotherm</b>            |                           |
| $A_T$ (L.g <sup>-1</sup> )        | 1.809                     |
| $B$ (J.mole <sup>-1</sup> )       | 0.00995                   |
| Standard Deviation (SD)           | 0.0351                    |
| Co-relation coefficient ( $R^2$ ) | 0.9629                    |

286  
 287  
 288  
 289  
 290  
 291

292 **Table S5** Various thermodynamic parameter for Pb<sup>2+</sup> adsorption onto the surface of KGDR  
 293 (Condition: Pb<sup>2+</sup> ion concentration 2.07 g/L, pH = 5, temperature 20°C to 60°C and contact time  
 294 125 min).

| Thermodynamic Parameters    |       |        |        |        |        |        |
|-----------------------------|-------|--------|--------|--------|--------|--------|
| $\Delta H^\circ$ (KJ/mole)  |       |        | 3.62   |        |        |        |
| $\Delta S^\circ$ (J/K/mole) |       |        | 14.384 |        |        |        |
| Temperature (K)             | 283   | 293    | 303    | 313    | 323    | 333    |
| $\Delta G^\circ$ (KJ/mole)  | -0.45 | -0.595 | -0.738 | -0.882 | -1.026 | -1.169 |

295

296

297

## 298 References

- 299 1. B. Gupta, M. Tummalapalli, B. L. Deopura and M. S. Alam, *Carbohydr. Polym.*, 2013, **98**,  
 300 1160-1165.
- 301 2. D. Sasmal, S. Banerjee, S. Senapati and T. Tripathy, *J. Environ. Chem. Eng.*, 2020, **8**, 103741.
- 302 3. B. Mondal, J. Ray, S. Jana, S. K. Bhanja and T. Tripathy, *New J. Chem.*, 2018, **42**, 19707-  
 303 19719.
- 304 4. S. K. Lagergren, *Sven. Vetenskapsakad. Handlingar*, 1898, **24**, 1-39.
- 305 5. Y. S. Ho, *J. Hazard. Mater.*, 2006, **136**, 681-689.
- 306 6. W. J. Weber Jr and J. C. Morris, *J. Sanit. Eng. Div.*, 1963, **89**, 31-59.
- 307 7. H. Freundlich, *Z Phys Chem (NF)*, 1907, **57**, 385-470.
- 308 8. Y. S. Ho, C. T. Huang and H. W. Huang, *Process Biochem*, 2002, **37**, 1421-1430.
- 309 9. T. Karthikeyan, S. Rajgopal and L. R. Miranda, *J. Hazard. Mater.*, 2005, **124**, 192-199.

- 310 10. S. Jana, J. Ray, S. K. Bhanja and T. Tripathy, *J. Appl. Polym. Sci.*, 2018, **135**, 44849.
- 311 11. S. Jana, S. S. Pradhan and T. Tripathy, *J. Polym. Environ.*, 2018, **26**, 2730-2747.
- 312 12. N. Serrano, A. González-Calabuig and M. Del Valle, *Talanta*, 2015, **138**, 130-137.
- 313 13. A. K. NS, S. Ashoka and P. Malingappa, *J. Environ. Chem. Eng.*, 2018, **6**, 6939-6946.
- 314 14. G. K. Raghu, S. Sampath and M. Pandurangappa, *J. Solid State Electrochem.*, 2012, **16**,  
315 1953-1963.
- 316 15. M. F. Philips, A. I. Gopalan and K. P. Lee, 2012, *J. Hazard. Mater.* **237**, 46-54.
- 317 16. M. Baghayeri, A. Amiri, B. Maleki, Z. Alizadeh and O. Reiser, *Sens. Actuators B*  
318 *Chem.*, 2018, **273**, 1442-1450.
- 319 17. N. Promphet, P. Rattanarat, R. Rangkupan, O. Chailapakul, N. Rodthongkum,  
320 *Sens. Actuators B Chem.*, 2015, **207**, 526-534.
- 321 18. A. Afkhami, H. Ghaedi, T. Madrakian and M. Rezaeivala, *Electrochim. Acta*, 2013, **89**, 377-  
322 386.
- 323 19. Y. Yao, H. Wu and J. Ping, *Food Chem.*, 2019, **274**, 8-15.
- 324 20. J. Yukird, P. Kongsittikul, J. Qin, O. Chailapakul and N. Rodthongkum, *Synth. Met.*, 2018,  
325 **245**, 251-259.
- 326
